# Supplementary material for: Effect of including the carbon nanotube and graphene oxide on the electrocatalytic behavior of the Ni–W alloy for the hydrogen evolution reaction
Source: Royal Society of Chemistry journal article supplement (doi:10.1039/c7nj02722b), 2017-01-01
Supplement: c7nj02722b1.pdf [file c7nj02722b1.pdf]

**Journal Name: New Journal of Chemistry**

**Manuscript Id: NJ-ART-07-2017-002722**

## **Effect of Carbon Nanotube and Graphene Oxide on the Electrocatalytic Behavior of Ni-W Alloy for Hydrogen Evolution Reaction**

**Liju Elias and A. Chitharanjan Hegde\***

Electrochemistry Research Lab, Department of Chemistry, National Institute of Technology  
Karnataka, Srinivasnagar P. O., Surathkal, Mangalore-575025, India

### **Supplementary Information**

#### **1. Characterization of functionalized CNT**

The CNT used in the present study was sourced from Sigma-Aldrich, St. Louis, Missouri, United States and functionalized using the chemical method as reported by Yang et al. [1]. Further, the functionalized MWCNTs were characterized using FTIR analysis (Bruker Alpha FTIR Spectrometer, Bruker Optic GmbH, Ettlingen, Germany) by scanning from wave number 500 – 4000  $\text{cm}^{-1}$ . The identified peaks around 1361, 1712 and 3401  $\text{cm}^{-1}$  are corresponding to C–O, C=O and O–H stretching, respectively [2, 3]. The peaks at 674, 1712 and 3401 confirms the introduction of carboxylic (COOH) functional group into the chemically modified MWCNTs as shown in Fig. S1.

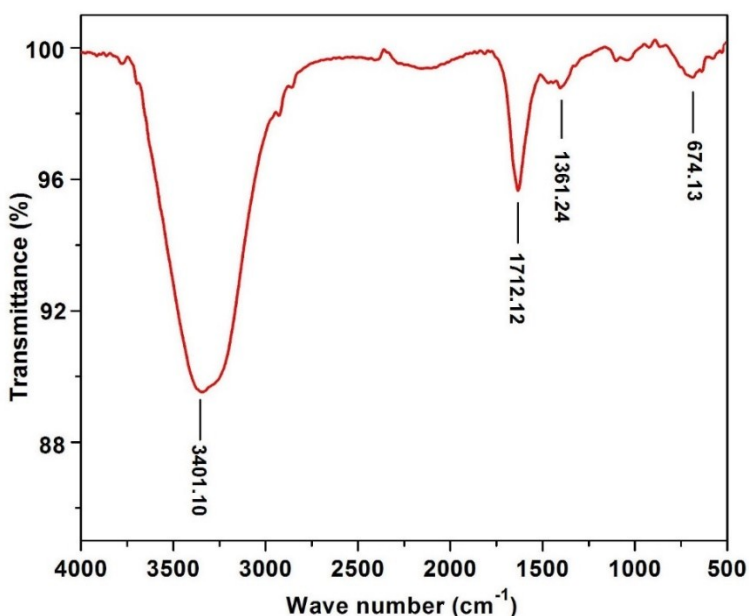

Fig. S1- FTIR spectrum of the acid treated MWCNTs showing characteristic peaks of generated functional groups confirm the surface modification after chemical oxidation

## 2. Characterization of the synthesized GO

The graphene oxide (GO) was synthesized using modified Hummer's method as reported by Su et al. [3]. The formation of GO after the chemical treatment of graphite was confirmed using various characterization techniques such as Raman spectroscopy (Bruker Senterra R200), X-ray diffraction (XRD, Rigaku Miniflex 600, with  $\text{CuK}\alpha$  radiation as the X-ray source) and transmission electron microscopy (TEM, JEOL, JEM-2100).

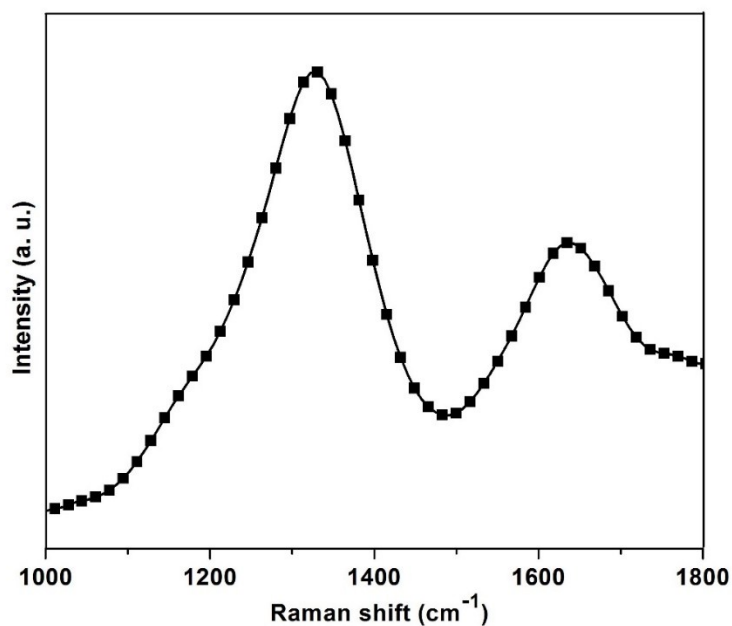

Fig. S2- Raman spectrum of the graphene oxide (GO) showing the two peaks at 1318 and 1610  $\text{cm}^{-1}$ , characteristics of the D and G bands corresponds to  $E_{2g}$  phonon of  $\text{sp}^2$  C atoms and carbon lattice defects, respectively

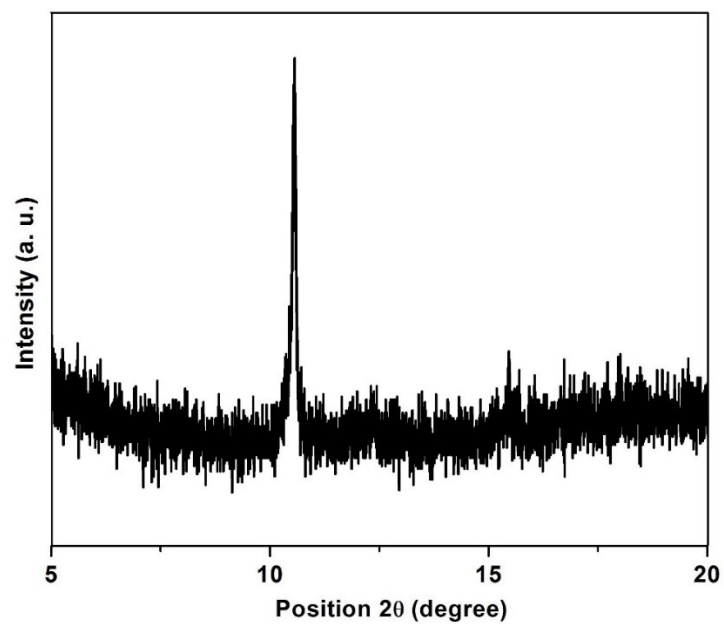

Fig. S3- XRD pattern of graphene oxide showing the presence of (101) reflection at  $2\theta = 10.4^\circ$ , with  $d$  spacing of 0.68 nm, due to the intercalation of oxygen confirms the formation of GO

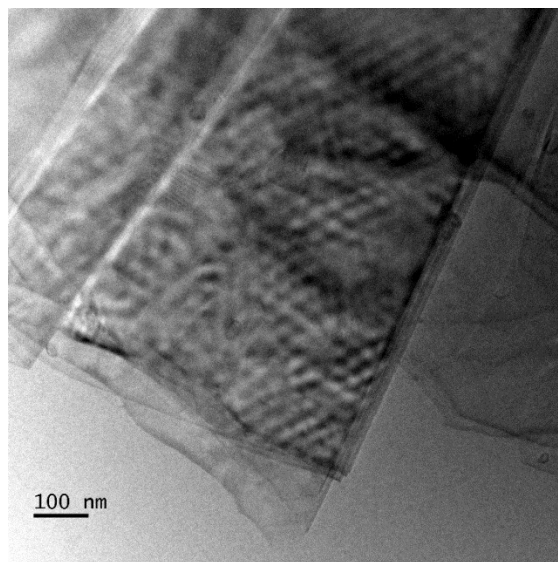

Fig. S4- TEM image clearly depicts the rippled and entangled GO nanosheets

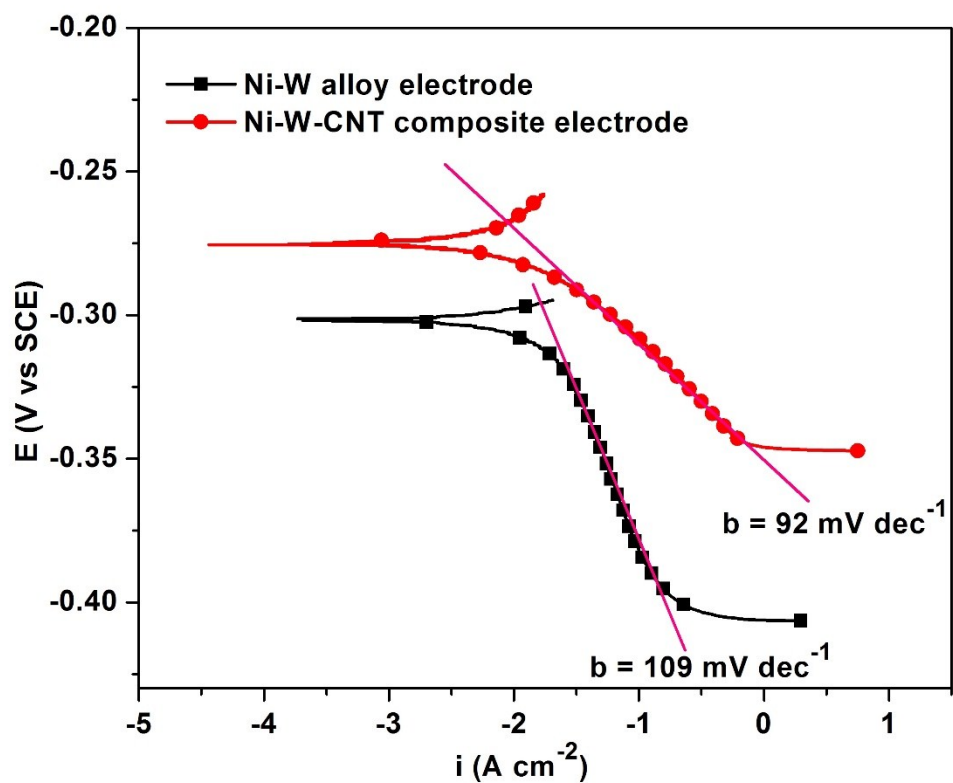

Fig. S5- Tafel polarization curves for the Ni-W alloy and Ni-W-CNT composite electrodes
